# Supplementary material
Source: HighWire-hosted journal article supplement (http://www.cmaj.ca/highwire/filestream/76492/field_highwire_adjunct_files/0/191707-guide-1-at.pdf)
Supplement: 191707-guide-1-at.pdf [file 191707-guide-1-at.pdf]

**Appendix 1 (as supplied by the authors)**  
**Figure 1. The Edmonton Obesity Staging System (29)**

**EOSS: EDMONTON OBESITY STAGING SYSTEM - Staging Tool**

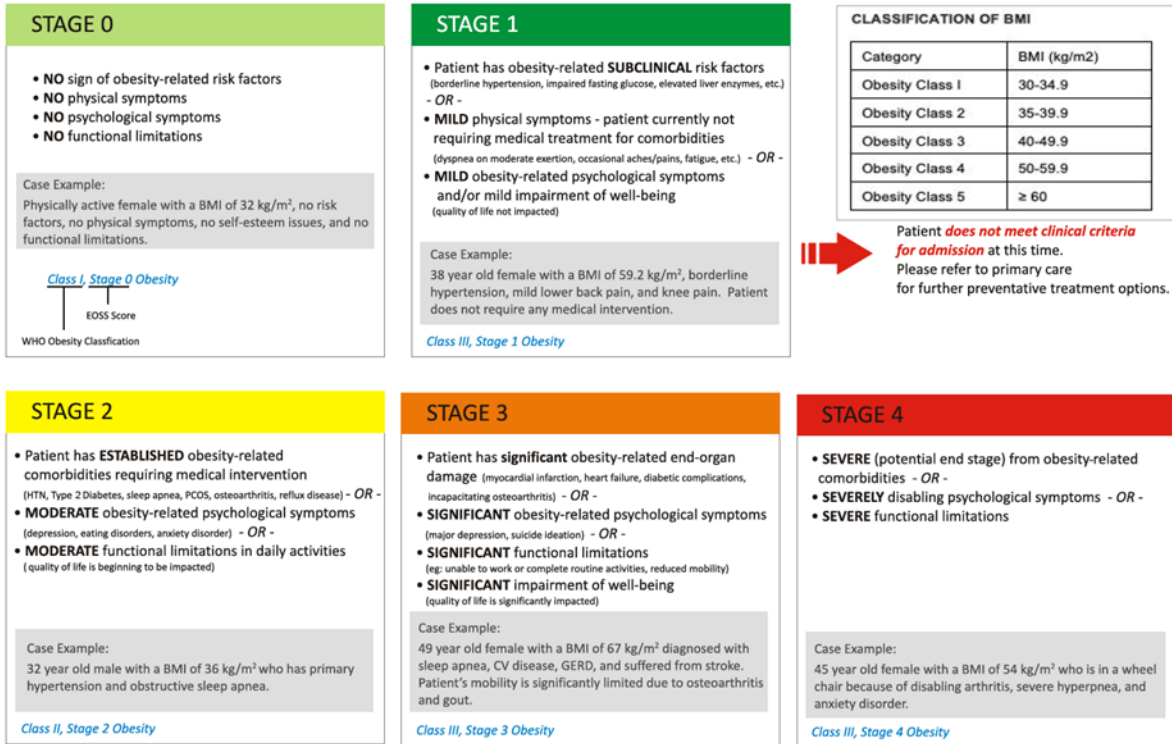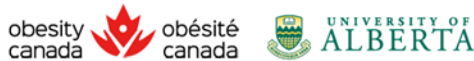

Sharma AM & Kushner RF, *Int J Obes* 2009
